# Supplementary material for: Interactions of platinum clusters with a graphite substrate
Source: Royal Society of Chemistry journal article supplement (doi:10.1039/c3cp51791h), 2013-01-01

## Supplementary information Interactions of Platinum Clusters with a Graphite Substrate by G. Ramos-Sanchez and P. B. Balbuena

### Figure Captions

**Figure S1.** Geometry of clusters after adsorption. Column 1: side view of the optimized clusters after adsorption of cluster on Bridge sites of graphite, optimized with the RPBE-D2 functional. Columns 2, 3 and 4: Top view of the clusters as function of size for the Bridge, Top and expanded structure sites respectively. The numbers in top view indicate the distance (in Å) between Pt atoms at the graphite-cluster interface. First value obtained with PBE-D2 functional, second value obtained with the RPBE-D2 functional.

**Figure S2.** Charge accumulation/depletion in the yz plane of the interface Graphite-Platinum as function of size and adsorption site. From left to right Pt<sub>4</sub>, Pt<sub>6</sub>, Pt<sub>13</sub> and Pt<sub>19</sub>. Scale is shown in the right side.

Fig. S1

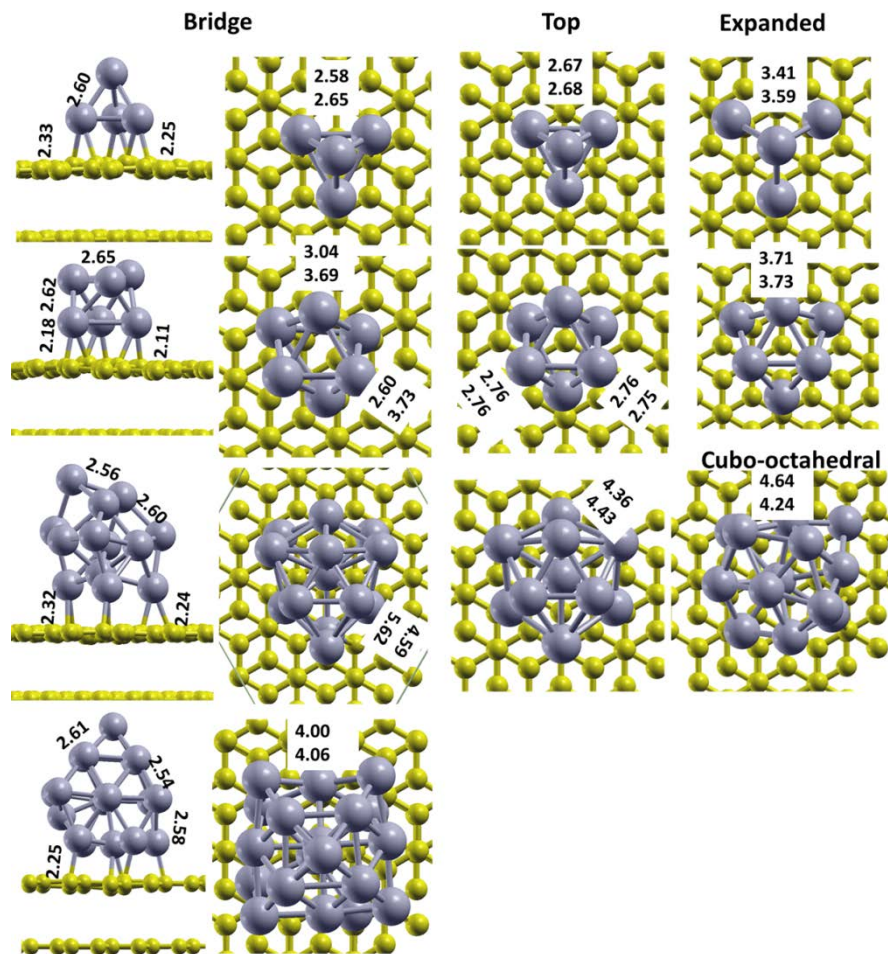

Fig S2

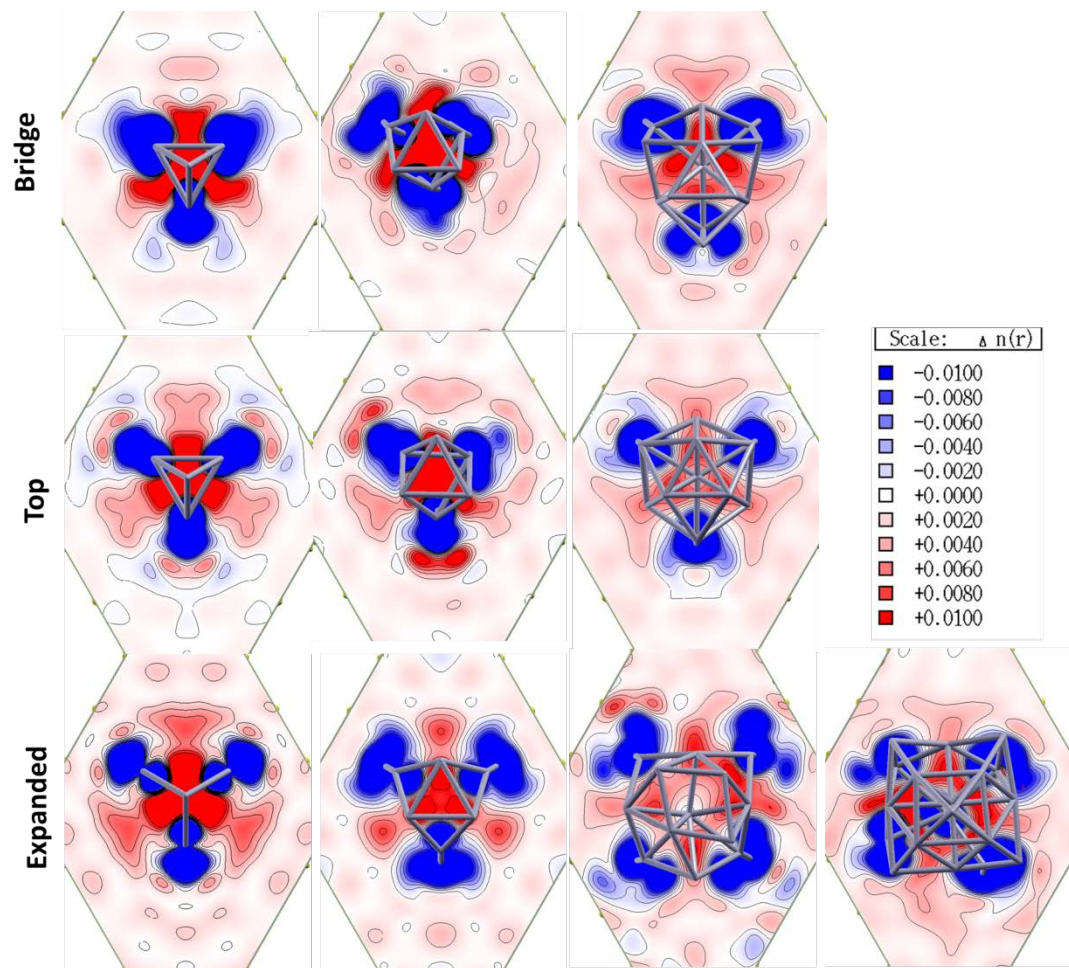

Supplement: c3cp51791h.pdf [file c3cp51791h.pdf]
